# Supplementary material for: Utilizing solid-state nanopore sensing for high-efficiency and precise targeted localization in antiviral drug development
Source: Royal Society of Chemistry journal article supplement (doi:10.1039/d4an00946k), 2024-01-01
Supplement: d4an00946k1.pdf [file d4an00946k1.pdf]

## Supporting information

### Utilizing Solid-State Nanopore Sensing for High-Efficiency and Precise Targeted Localization in Antiviral Drug Development

Wei Xu, † Lichun Zou, † Haiyan Wang, Changhui Xu, Qinyang Fan and Jingjie Sha\*

Jiangsu Key Laboratory for Design and Manufacture for Micro/Nano Biomedical Instruments, School of Mechanical Engineering, Southeast University, Nanjing 211189, People's Republic of China.

\*Corresponding Authors.

E-mail: major212@seu.edu.cn

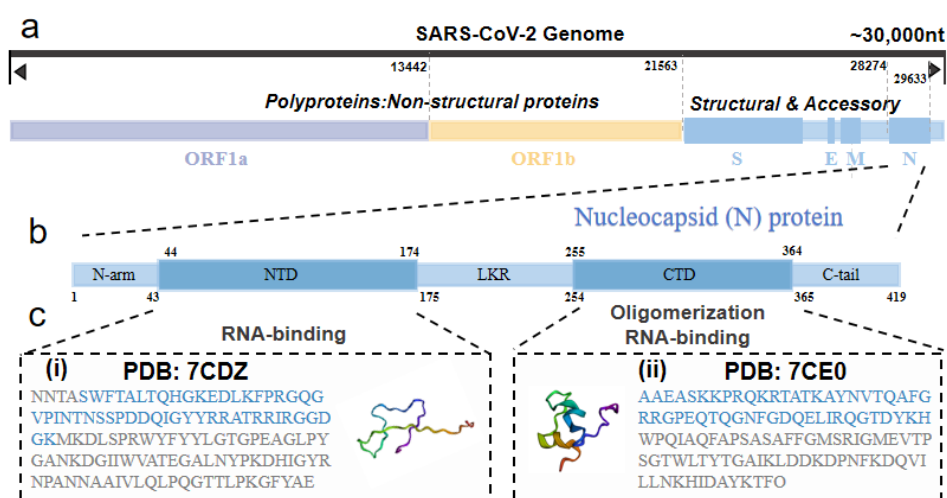

Figure S1. Overview of the proteins used in the experiments.

#### CERTIFICATE OF ANALYSIS

|                      |                                                    |                |
|----------------------|----------------------------------------------------|----------------|
| Product Name         | N1b51-100                                          |                |
| Order ID             | C9591GE170_1                                       |                |
| Lot No.              | C9591GE170-1/PE4437                                |                |
| Sequence             | SWFTALTQHGKEDLKFRGQGVPIINTNSSPDDQIGYYRRATRRIRGGDGK |                |
| Modification         | N/A                                                |                |
| Length               | 50AA                                               |                |
| Storage              | -20 °C                                             |                |
| Recommended Solvent* | ultrapure water                                    |                |
| comments             | TFA salt                                           |                |
| <b>Test Items</b>    | <b>Specifications</b>                              | <b>Results</b> |
| Molecular Weight     | Theoretical MW: 5649.20                            | Consistent     |
| HPLC purity          | ≥85.0%                                             | 86.6%          |
| Appearance           | White lyophilized powder                           | Conforms       |
| Gross Weight         | 4 mg                                               | 4*1.0mg        |

**CERTIFICATE OF ANALYSIS**

|                      |                                                     |  |
|----------------------|-----------------------------------------------------|--|
| Product Name         | N2b251-300                                          |  |
| Order ID             | C9591GE170_3                                        |  |
| Lot No.              | C9591GE170-3/PE4439                                 |  |
| Sequence             | AAEASKKPRQKRTATKAYNVTAQAFGRRGPEQTQGNFGDQELIRQGTDYKH |  |
| Modification         | N/A                                                 |  |
| Length               | 50AA                                                |  |
| Storage              | -20°C                                               |  |
| Recommended Solvent* | ultrapure water                                     |  |
| comments             | TFA salt                                            |  |

  

| Test Items       | Specifications           | Results    |
|------------------|--------------------------|------------|
| Molecular Weight | Theoretical MW: 5636.16  | Consistent |
| HPLC purity      | ≥85.0%                   | 94.1%      |
| Appearance       | White lyophilized powder | Conforms   |
| Gross Weight     | 4 mg                     | 4*1.0mg    |

**Figure S2.** Purity analysis of 7CDZ peptides and 7CE0 peptides.

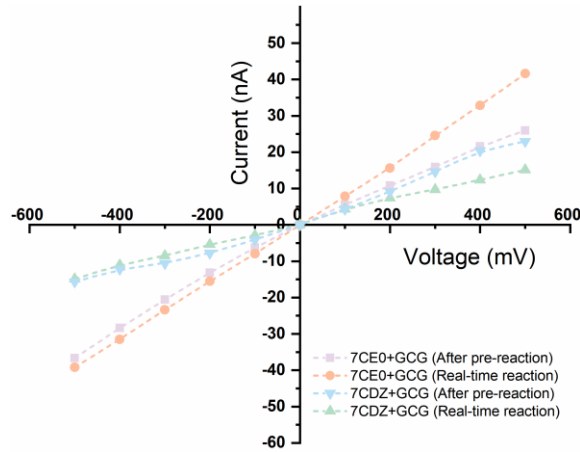

**Figure S3.** I-V curves of all nanopores used in the experiments. The nanopores calculation results are 11nm (green line), 12nm (blue line), 14nm (purple line) and 17nm (brown line), respectively.

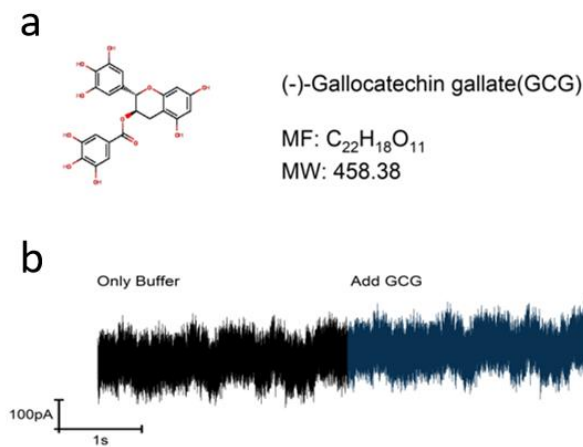

**Figure S4.** Molecular structure of GCG and current trace changes.

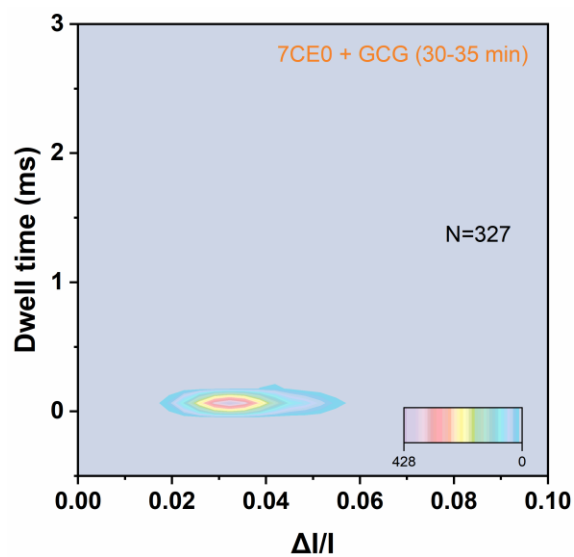

**Figure S5.** Scatter plot of dwell time and normalized relative current amplitude for translocation events generated in 30-35 min.

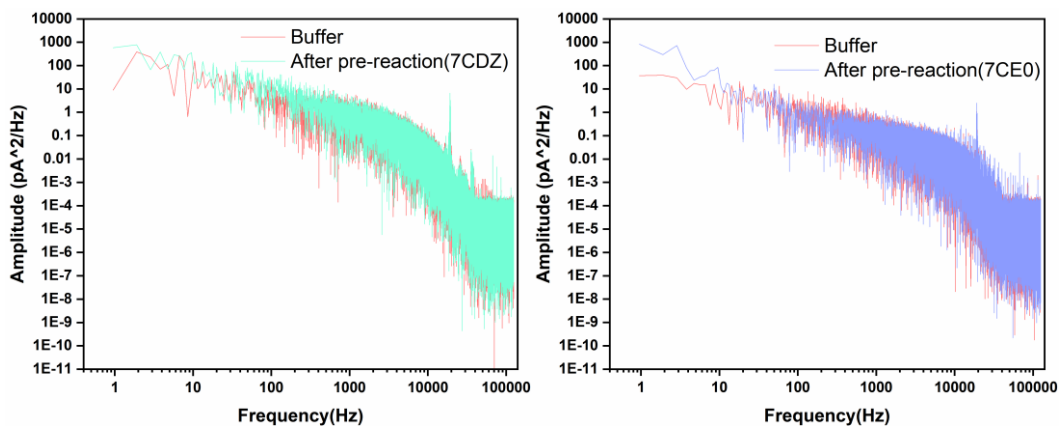

**Figure S6.** Noise analysis after pre-reaction, blue for 7CE0, green for 7CDZ.
